# Supplementary material
Source: MDPI journal article supplement (https://www.mdpi.com/2071-1050/15/16/12292)
Supplement: s1 [file s1 › sustainability-2432432-supplementary.pdf]

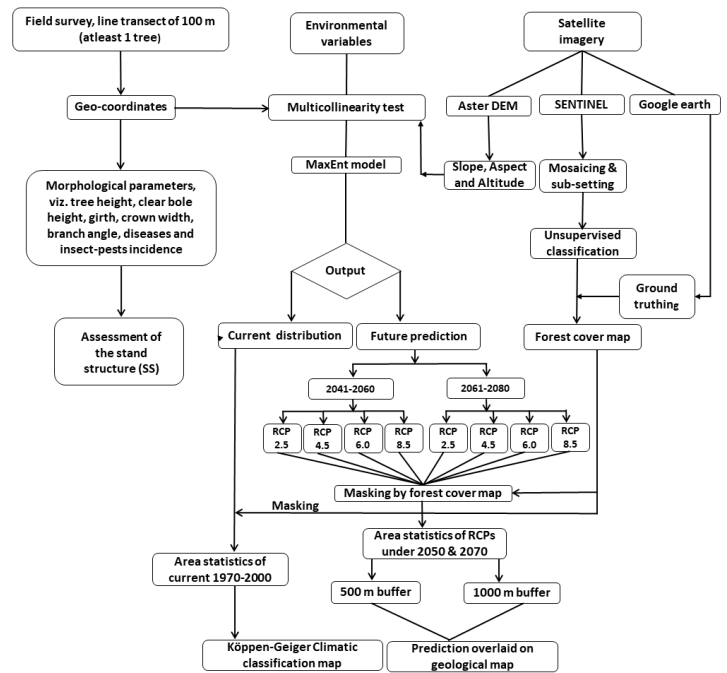

Supplementary Figure S1. Methodology flow chart.

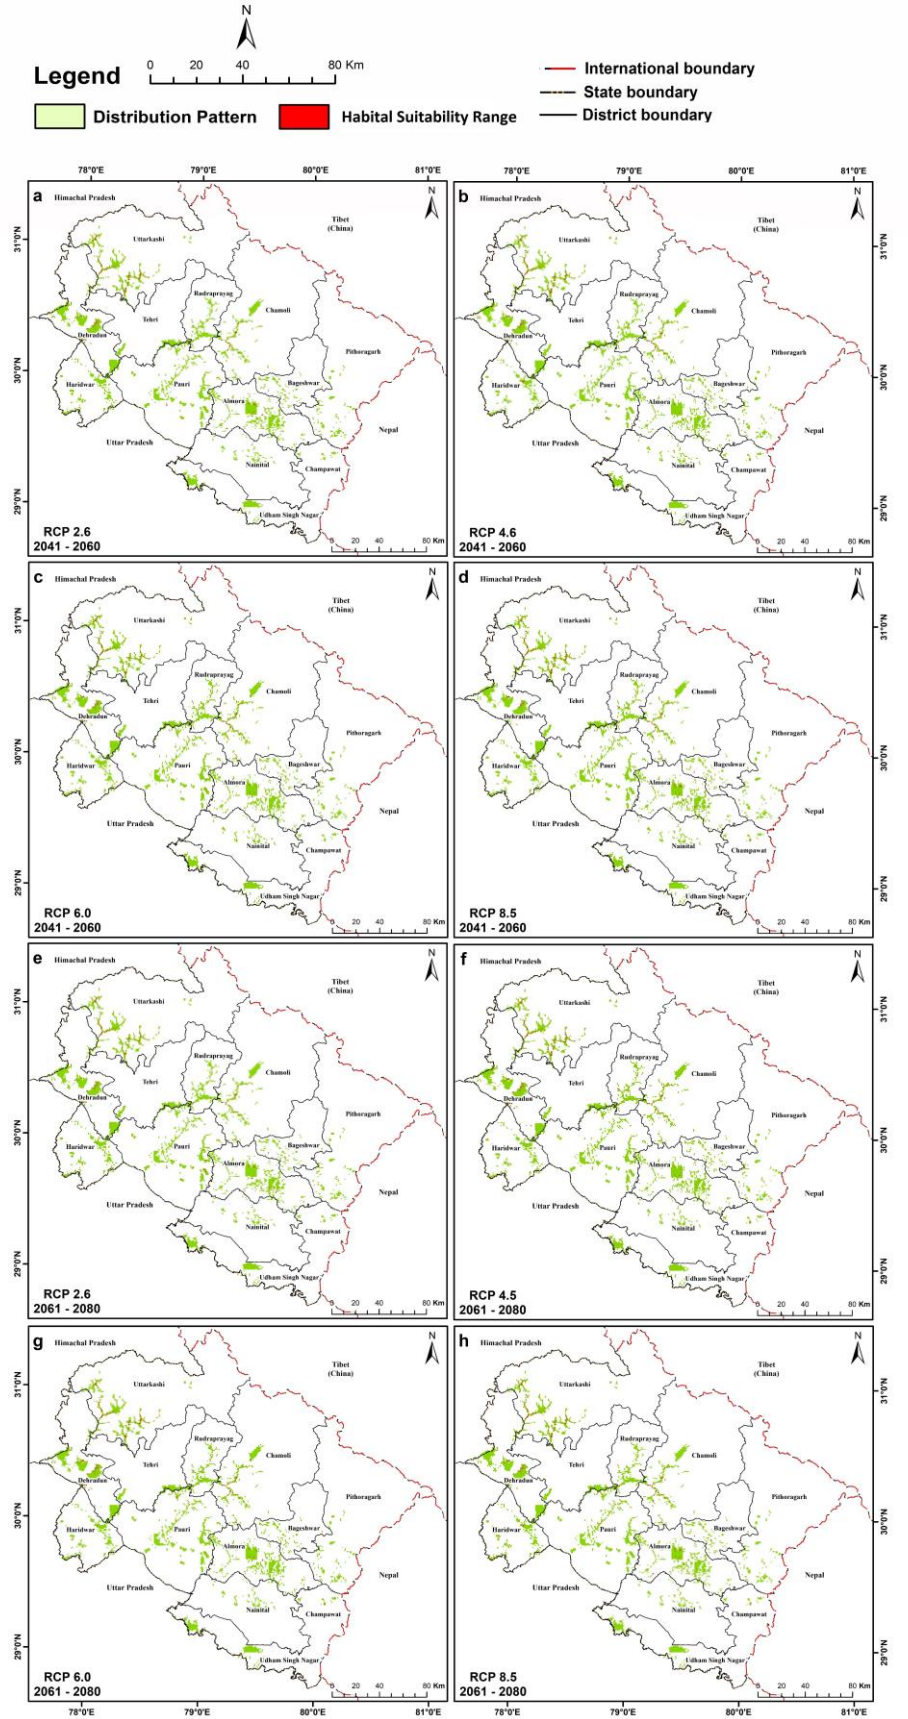

**Supplementary Figure S2.** Predicted distribution of *G. robusta* in the future scenario for different RCPs in the northwestern Himalayas (500 m buffer). Note: RCPs from the period of 2041–2060: (a) RCP 2.6; (b) RCP 4.5; (c) RCP 6.0;

and (d) RCP 8.5; and from 2061–2080: (e) RCP 2.6; (f) RCP 4.5; (g) RCP 6.0; and (h) RCP 8.5.].

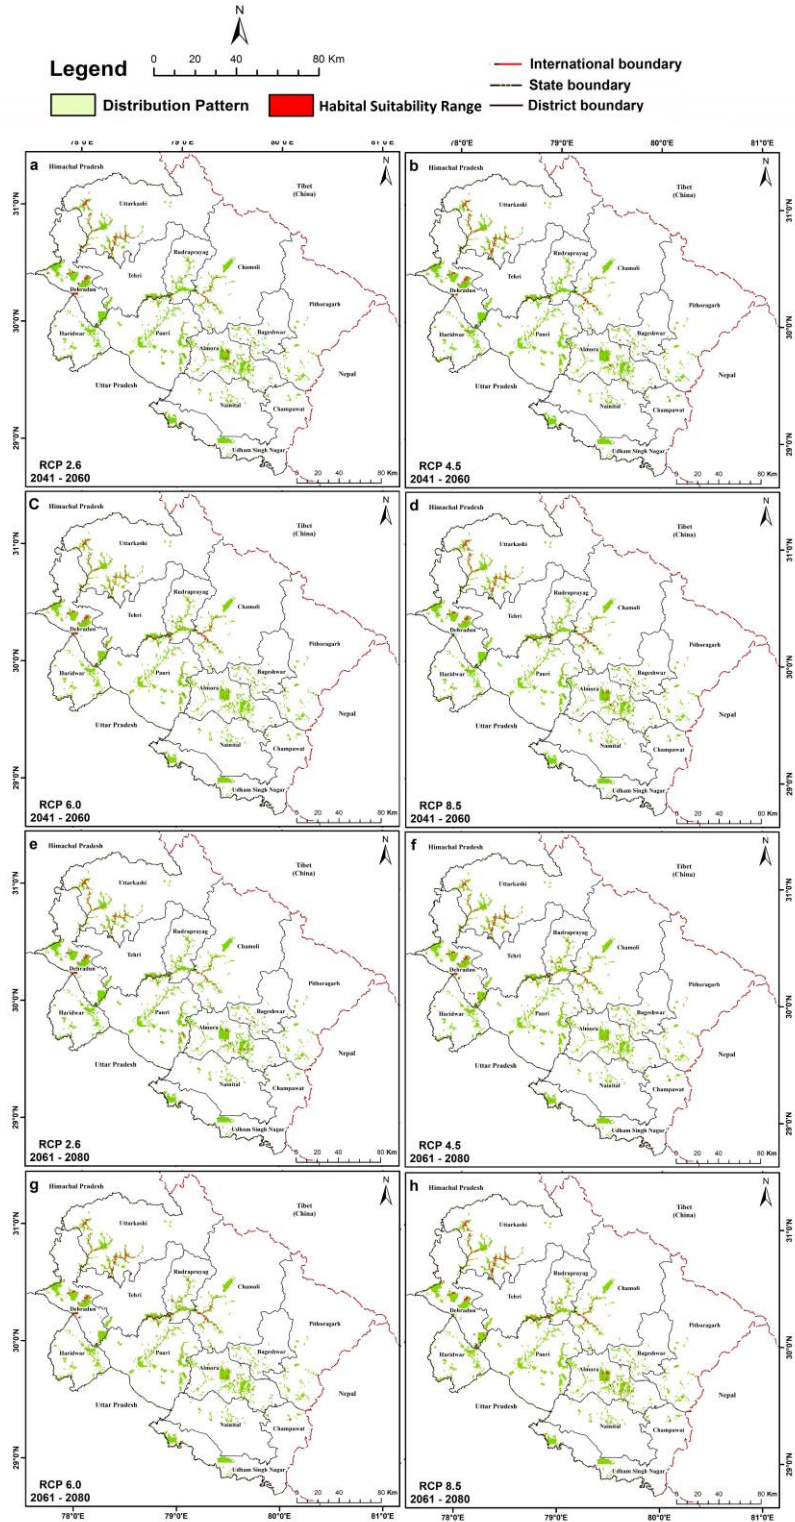

**Supplementary Figure S3.** Predicted distribution of *G. robusta* in the future scenarios for different RCPs in the northwestern Himalayas (1000 m buffer). Note: RCPs from the period of 2041–2060: (a) RCP 2.6; (b) RCP 4.5; (c) RCP 6.0;

and (d) RCP 8.5; and from 2061–2080: (e) RCP 2.6; (f) RCP 4.5; (g) RCP 6.0; and (h) RCP 8.5.].
